# Supplementary material for: Two-stepping: sol–gel–gel transitions in a mixed thermoresponsive polymer system
Source: Royal Society of Chemistry journal article supplement (doi:10.1039/d4py00771a), 2025-01-01
Supplement: d4py00771a1.zip [file d4py00771a1.zip]

## Sheet: N10E5_25
<X>	<Y>	<dY>	<dX>	<X>	<Y>	N10E5 25 °C	N10E5 25 °C_PL + PGC		sasview_parameter_values	Column1	_1	_2	_3	_4	_5
0.00156	16.5378	37.4376	0.000313792	0.00156	60.6007				model_name	PLPlusPGC
0.0016848	48.7873	28.8941	0.000320867	0.0016848	46.2843				scale	False	1		0.0	inf	()
0.00181958	38.0379	20.9697	0.0003218	0.00181958	34.5504				background	False	0.07		-inf	inf	()
0.00196515	11.8717	12.3776	0.000334262	0.00196515	27.0562				A_scale	True	6.569e-08	5.4808e-08	-inf	inf	()
0.00212236	12.1927	8.38016	0.000344157	0.00212236	21.2949				A_power	True	3.144	0.14934	-inf	inf	()
0.00229215	14.1985	6.17874	0.000356555	0.00229215	16.933				B_scale	False	0.075		-inf	inf	()
0.00247552	12.9624	4.02001	0.000379978	0.00247552	13.5904				B_i_zero	False	20		0.0	inf	()
0.00267357	15.2822	3.36972	0.000399738	0.00267357	10.947				B_rg	True	55.962	1.0211	0.0	inf	()
0.00288745	6.7556	2.16989	0.00041117	0.00288745	8.74713				B_polydispersity	True	3.4934	1.5904	1.8	inf	()
0.00311845	8.83118	1.73164	0.000439192	0.00311845	7.18983
0.00336792	5.34638	1.20939	0.000443243	0.00336792	5.92841
0.00363736	5.59666	0.954773	0.000509993	0.00363736	5.02
0.00392835	3.77482	0.732039	0.000512635	0.00392835	4.23947
0.00424261	4.70261	0.579743	0.000557591	0.00424261	3.65905
0.00458202	2.89294	0.441149	0.000562558	0.00458202	3.16056
0.00494858	3.18349	0.387118	0.000593007	0.00494858	2.80751
0.00534447	2.66171	0.29415	0.000632801	0.00534447	2.52593
0.00577203	2.49651	0.248309	0.000666863	0.00577203	2.30178
0.00623379	1.93337	0.198879	0.000681931	0.00623379	2.12159
0.00673249	2.165	0.179147	0.000687085	0.00673249	1.9712
0.00727109	1.9608	0.153097	0.00069744	0.00727109	1.85853
0.00785278	1.79011	0.131112	0.000717589	0.00785278	1.76661
0.008481	1.85412	0.117891	0.000728158	0.008481	1.69119
0.00915948	1.40789	0.0978709	0.000750561	0.00915948	1.62288
0.00989224	1.46562	0.0899254	0.000764699	0.00989224	1.5674
0.0106836	1.4463	0.0807807	0.000781156	0.0106836	1.51762
0.0115383	1.51475	0.0740268	0.000782962	0.0115383	1.47159
0.0124614	1.49456	0.066557	0.000782264	0.0124614	1.42775
0.0134583	1.32737	0.0588435	0.000795819	0.0134583	1.38485
0.0145349	1.25734	0.0527265	0.000812229	0.0145349	1.33969
0.0156977	1.20136	0.0474667	0.000800119	0.0156977	1.29739
0.0169536	1.2621	0.0449667	0.000831744	0.0169536	1.2523
0.0183098	1.12641	0.0394305	0.000846227	0.0183098	1.20548
0.0197746	1.08436	0.0358317	0.000868743	0.0197746	1.15666
0.0213566	1.08731	0.0328762	0.000906591	0.0213566	1.10577
0.0230651	1.07291	0.0305246	0.00092963	0.0230651	1.053
0.0249103	0.993997	0.027195	0.000971945	0.0249103	0.998502
0.0269032	0.9467	0.0252326	0.00099954	0.0269032	0.942697
0.0290554	0.880869	0.022986	0.00104245	0.0290554	0.885999
0.0313799	0.845828	0.021239	0.00109787	0.0313799	0.828941
0.0338903	0.805028	0.0195826	0.00114926	0.0338903	0.77209
0.0366015	0.721493	0.0178518	0.00120038	0.0366015	0.71601
0.0395296	0.678251	0.0167153	0.00127582	0.0395296	0.661262
0.042692	0.612039	0.0154767	0.00134917	0.042692	0.608345
0.0461073	0.549712	0.0143127	0.00142864	0.0461073	0.5577
0.0497959	0.50375	0.0134058	0.00151181	0.0497959	0.509688
0.0537796	0.465598	0.012666	0.00159837	0.0537796	0.464583
0.0580819	0.421923	0.0120916	0.00170932	0.0580819	0.417829
0.0627285	0.379738	0.0114611	0.00182071	0.0627285	0.379531
0.0677468	0.356706	0.0112623	0.00194399	0.0677468	0.344408
0.0731665	0.31299	0.0110037	0.00206533	0.0731665	0.312473
0.0790198	0.286107	0.0107228	0.00219741	0.0790198	0.28357
0.0853414	0.244362	0.0108158	0.00235438	0.0853414	0.257531
0.0921687	0.236892	0.0108943	0.00251987	0.0921687	0.234241
0.0995422	0.220364	0.0112738	0.00268894	0.0995422	0.213515
0.107506	0.177551	0.0112204	0.00287658	0.107506	0.195127
0.116106	0.174016	0.0128205	0.00308423	0.116106	0.179916
0.125395	0.175866	0.0147165	0.00330584	0.125395	0.165465
0.135426	0.128693	0.0163761	0.00356261	0.135426	0.152786
0.14626	0.112286	0.0185572	0.0038254	0.14626	0.141691
0.157961	0.137182	0.0223399	0.00409931	0.157961	0.132007
0.170598	0.0813657	0.0283595	0.00439509	0.170598	0.123572
0.184246	0.104188	0.0367071	0.00469355	0.184246	0.11624
0.198985	0.0898404	0.053183	0.0050411	0.198985	0.109878
0.214904	0.0402607	0.0713981	0.00537908	0.214904	0.104366
0.232097	0.0181688	0.129684	0.00582646	0.232097	0.0995955
0.250664	0	1000000	0	0.250664	0.0954728

## Sheet: N1035_37
<X>	<Y>	<dY>	<dX>	N10E5 37 °C
0.00156	2903.65	162.244	0.000307756
0.0016848	2929	122.697	0.000317461
0.00181958	2659.11	87.6065	0.000324427
0.00196515	2546.76	62.0063	0.000330478
0.00212236	2351.64	46.023	0.000341218
0.00229215	2170.35	35.1105	0.000355119
0.00247552	2004.11	26.9037	0.000372648
0.00267357	1825.21	21.5186	0.000390854
0.00288745	1624.1	16.9141	0.000412551
0.00311845	1476.64	13.7254	0.000435948
0.00336792	1345.98	11.2119	0.000458097
0.00363736	1243.41	9.24215	0.000486696
0.00392835	1132.6	7.72144	0.00050972
0.00424261	1054.33	6.53736	0.000537443
0.00458202	967.923	5.57239	0.000561462
0.00494858	888.677	4.72077	0.000588923
0.00534447	812.442	4.03331	0.000610091
0.00577203	736.814	3.46039	0.000635639
0.00623379	668.189	2.96421	0.000659375
0.00673249	595.766	2.52953	0.000679545
0.00727109	529.113	2.16935	0.000697717
0.00785278	455.566	1.83554	0.000713665
0.008481	384.999	1.5426	0.000729797
0.00915948	322.586	1.29287	0.000737437
0.00989224	262.323	1.0673	0.000752613
0.0106836	203.827	0.868162	0.000757906
0.0115383	157.012	0.698208	0.000775389
0.0124614	115.586	0.552561	0.000778675
0.0134583	82.4514	0.429374	0.000793835
0.0145349	56.8748	0.328542	0.000802672
0.0156977	37.2129	0.244801	0.000812913
0.0169536	23.6789	0.18051	0.000837322
0.0183098	14.5276	0.130942	0.000846777
0.0197746	8.67057	0.0942736	0.000872465
0.0213566	5.79398	0.0717234	0.000895293
0.0230651	4.23231	0.057357	0.000928527
0.0249103	3.36221	0.0477213	0.000961062
0.0269032	2.84633	0.0414667	0.000996756
0.0290554	2.38835	0.0358923	0.00104606
0.0313799	1.94941	0.0307894	0.00109882
0.0338903	1.64279	0.0268921	0.00115206
0.0366015	1.27573	0.0228749	0.00121629
0.0395296	0.955572	0.0193291	0.00128238
0.042692	0.790144	0.0171965	0.00134856
0.0461073	0.674237	0.0155501	0.00142806
0.0497959	0.592655	0.0143116	0.00151143
0.0537796	0.512487	0.0131642	0.00161072
0.0580819	0.428899	0.0121784	0.00170745
0.0627285	0.381392	0.0114909	0.0018161
0.0677468	0.320755	0.0108486	0.00192355
0.0731665	0.28651	0.0106848	0.00205979
0.0790198	0.270836	0.0105279	0.00220329
0.0853414	0.209644	0.0103202	0.0023491
0.0921687	0.194982	0.0102379	0.00251389
0.0995422	0.181459	0.0106091	0.00268287
0.107506	0.175318	0.0111814	0.00288476
0.116106	0.132064	0.0118758	0.00307921
0.125395	0.108967	0.0129346	0.00330822
0.135426	0.0866927	0.0150554	0.00356051
0.14626	0.0908732	0.0177665	0.00382586
0.157961	0.0865469	0.0200084	0.00409499
0.170598	0.0961183	0.0291516	0.00438997
0.184246	0.0594516	0.032872	0.00469566
0.198985	0.129074	0.05787	0.00501907
0.214904	0.0703085	0.0790736	0.00540246
0.232097	0.381076	0.287352	0.00579124
0.250664	0	1000000	0

## Sheet: N1035_37_FIT
<X>	<Y>	N10E5 37 °C Cyl + PGC
0.00156	3987.58
0.0016848	3672.78
0.00181958	3377.24
0.00196515	3093.09
0.00212236	2846.14
0.00229215	2620.73
0.00247552	2407.52
0.00267357	2200.82
0.00288745	2016.43
0.00311845	1843.91
0.00336792	1682.19
0.00363736	1531
0.00392835	1388.77
0.00424261	1250.17
0.00458202	1125.92
0.00494858	1010.92
0.00534447	900.426
0.00577203	796.811
0.00623379	695.4
0.00673249	605.479
0.00727109	521.507
0.00785278	443.468
0.008481	372.661
0.00915948	303.386
0.00989224	244.58
0.0106836	192.162
0.0115383	146.433
0.0124614	107.753
0.0134583	76.242
0.0145349	50.732
0.0156977	32.6016
0.0169536	19.8224
0.0183098	11.831
0.0197746	7.2858
0.0213566	5.12841
0.0230651	4.18331
0.0249103	3.7443
0.0269032	3.3223
0.0290554	2.72905
0.0313799	2.14687
0.0338903	1.64363
0.0366015	1.24707
0.0395296	0.984593
0.042692	0.820845
0.0461073	0.695575
0.0497959	0.580431
0.0537796	0.481931
0.0580819	0.399664
0.0627285	0.345737
0.0677468	0.303661
0.0731665	0.269139
0.0790198	0.238293
0.0853414	0.212069
0.0921687	0.189393
0.0995422	0.170363
0.107506	0.155111
0.116106	0.14308
0.125395	0.132168
0.135426	0.123315
0.14626	0.115782
0.157961	0.109177
0.170598	0.103587
0.184246	0.0988005
0.198985	0.0947101
0.214904	0.0911748
0.232097	0.0880887
0.250664	0.0854641

## Sheet: N1035_37_PARAM txt
sasview_parameter_values	Column1	_1	_2	_3	_4	_5	_6	_7
model_name	CylPlusPGC
scale	False	1		0.0	inf	()
background	False	0.07		-inf	inf	()
A_scale	False	0.0062093		-inf	inf	()
A_sld	False	0.9		-inf	inf	()
A_sld_solvent	False	6.37		-inf	inf	()
A_radius	False	168.95		0.0	inf	()
A_length	False	20867		0.0	inf	()
B_scale	True	0.048347	0.00066121	-inf	inf	()
B_i_zero	False	20		0.0	inf	()
B_rg	False	54		0.0	inf	()
B_polydispersity	False	1.8		1.8	inf	()
A_radius.width	False	0.2		0.0	1.0	35	3	gaussian
A_length.width	False	0		0.0	1.0	35	3	gaussian

## Sheet: N1035_40
<X>	<Y>	<dY>	<dX>	N10E5 40 °C
0.00156	3159.89	169.749	0.000308417
0.0016848	2960.69	123.842	0.000316354
0.00181958	3004.45	93.339	0.000321704
0.00196515	2913	66.4547	0.000331547
0.00212236	2807.41	50.4201	0.000341054
0.00229215	2610.03	38.6168	0.000354548
0.00247552	2531.42	30.3475	0.000373024
0.00267357	2423.12	24.8864	0.000391829
0.00288745	2253.49	20.0004	0.000414116
0.00311845	2101.32	16.4364	0.00043751
0.00336792	1990.83	13.6913	0.000459451
0.00363736	1850.1	11.3193	0.000486165
0.00392835	1717.22	9.54735	0.000511749
0.00424261	1625.36	8.15394	0.000538344
0.00458202	1516.02	7.006	0.000561457
0.00494858	1414.17	5.98334	0.000589188
0.00534447	1290.18	5.10732	0.000612505
0.00577203	1199.22	4.43698	0.000637458
0.00623379	1086.02	3.79789	0.000661418
0.00673249	971.386	3.246	0.000683066
0.00727109	873.13	2.80011	0.000700642
0.00785278	767.114	2.39312	0.000714376
0.008481	661.732	2.03148	0.000729421
0.00915948	560.423	1.71107	0.000740881
0.00989224	464.079	1.42493	0.000756572
0.0106836	380.94	1.19094	0.000761011
0.0115383	303.039	0.973011	0.000774684
0.0124614	235.119	0.790292	0.000780689
0.0134583	175.709	0.62821	0.000794278
0.0145349	129.796	0.497159	0.000800113
0.0156977	90.5682	0.382251	0.000816495
0.0169536	61.2196	0.290097	0.000833852
0.0183098	39.9431	0.216604	0.000852536
0.0197746	24.7464	0.158434	0.000871925
0.0213566	14.5972	0.113103	0.000899799
0.0230651	8.96342	0.0827366	0.000925925
0.0249103	5.49383	0.0606167	0.000960745
0.0269032	3.69163	0.047001	0.000995604
0.0290554	2.85578	0.0391052	0.00104474
0.0313799	2.37867	0.0338394	0.00109285
0.0338903	1.94205	0.0291086	0.00115024
0.0366015	1.54571	0.0249962	0.00121142
0.0395296	1.18774	0.021298	0.00127625
0.042692	0.863114	0.0178779	0.00134807
0.0461073	0.605594	0.0149119	0.00143454
0.0497959	0.476509	0.0131538	0.00151053
0.0537796	0.388046	0.0118501	0.0016034
0.0580819	0.329336	0.011079	0.00169878
0.0627285	0.263887	0.0100999	0.00181489
0.0677468	0.23757	0.00981008	0.00192929
0.0731665	0.190719	0.00941049	0.00206715
0.0790198	0.163757	0.00897164	0.00220643
0.0853414	0.135223	0.00915563	0.00235358
0.0921687	0.121923	0.00897294	0.00250948
0.0995422	0.132086	0.00970096	0.00268956
0.107506	0.116477	0.00994712	0.00288655
0.116106	0.103297	0.011188	0.00309491
0.125395	0.0899791	0.0123888	0.00331138
0.135426	0.0646252	0.0143167	0.00355373
0.14626	0.0554083	0.0163843	0.00381061
0.157961	0.0751998	0.0194485	0.00408728
0.170598	0.0866111	0.0286183	0.00439672
0.184246	0.104643	0.0366944	0.0047034
0.198985	0.128783	0.0578202	0.00503955
0.214904	0.0508073	0.0741013	0.00544007
0.232097	-0.0464808	0.0716991	0
0.250664	0	1000000	0

## Sheet: N1035_40_FIT
<X>	<Y>	N10E5 40 °C Cyl + PGC
0.00156	2936.54
0.0016848	2893.34
0.00181958	2841.48
0.00196515	2784.26
0.00212236	2719.82
0.00229215	2648.83
0.00247552	2567.15
0.00267357	2473.93
0.00288745	2373.72
0.00311845	2264.18
0.00336792	2145.74
0.00363736	2018.87
0.00392835	1884.96
0.00424261	1740.89
0.00458202	1598.77
0.00494858	1458.2
0.00534447	1316.59
0.00577203	1179.94
0.00623379	1050.59
0.00673249	925.96
0.00727109	816.393
0.00785278	715.674
0.008481	624.009
0.00915948	531.693
0.00989224	448.694
0.0106836	369.778
0.0115383	296.611
0.0124614	231.608
0.0134583	176.441
0.0145349	129.259
0.0156977	91.9155
0.0169536	61.5226
0.0183098	38.8428
0.0197746	23.9676
0.0213566	14.7778
0.0230651	9.07516
0.0249103	6.33479
0.0269032	5.3486
0.0290554	4.44353
0.0313799	3.77954
0.0338903	2.97705
0.0366015	2.16137
0.0395296	1.55792
0.042692	1.12816
0.0461073	0.825347
0.0497959	0.67862
0.0537796	0.511303
0.0580819	0.368693
0.0627285	0.30319
0.0677468	0.253884
0.0731665	0.211014
0.0790198	0.175985
0.0853414	0.147314
0.0921687	0.126853
0.0995422	0.116978
0.107506	0.106851
0.116106	0.0977567
0.125395	0.0918367
0.135426	0.0883321
0.14626	0.0844922
0.157961	0.0815246
0.170598	0.0789326
0.184246	0.076897
0.198985	0.075867
0.214904	0.0748425
0.232097	0.0739481
0.250664	0.0731945

## Sheet: N1035_40_PARAM txt
sasview_parameter_values	Column1	_1	_2	_3	_4	_5	_6	_7
model_name	CylPlusPGC
scale	False	1		0.0	inf	()
background	False	0.07		-inf	inf	()
A_scale	False	0.011858		-inf	inf	()
A_sld	False	0.9		-inf	inf	()
A_sld_solvent	False	6.37		-inf	inf	()
A_radius	False	148.85		0.0	inf	()
A_length	False	1096.4		0.0	inf	()
B_scale	False	0.0075	0.00065868	-inf	inf	()
B_i_zero	False	20		0.0	inf	()
B_rg	False	54		0.0	inf	()
B_polydispersity	False	1.8		1.8	inf	()
A_radius.width	False	0.2		0	1	35	3	gaussian
A_length.width	False	0		0	1	35	3	gaussian

## Sheet: N1035_50
<X>	<Y>	<dY>	<dX>	N10E5 50 °C
0.00156	12579.3	341.38	0.000308703
0.0016848	12036	252.713	0.000316233
0.00181958	10791.8	178.92	0.000322169
0.00196515	9627.13	122.418	0.000330045
0.00212236	8780.31	90.4889	0.000342315
0.00229215	8025.79	68.8321	0.000356175
0.00247552	7247.18	52.3378	0.000374665
0.00267357	6465.78	41.2856	0.000392953
0.00288745	5805.3	32.5448	0.000415533
0.00311845	5204.58	26.1435	0.000438759
0.00336792	4635.42	21.0817	0.00046091
0.00363736	4077.71	16.9288	0.000488532
0.00392835	3601.35	13.9152	0.000514467
0.00424261	3169.02	11.4497	0.000542559
0.00458202	2738.29	9.45863	0.000563391
0.00494858	2388.89	7.80471	0.000592754
0.00534447	2042.76	6.44445	0.000617045
0.00577203	1743.89	5.35991	0.000641942
0.00623379	1488.93	4.45126	0.00066594
0.00673249	1257.98	3.69494	0.000687079
0.00727109	1060.96	3.08533	0.000705033
0.00785278	884.145	2.56665	0.000718816
0.008481	731.074	2.13231	0.000734979
0.00915948	602.896	1.77183	0.000744067
0.00989224	486.37	1.45614	0.000759012
0.0106836	389.739	1.20231	0.000762116
0.0115383	308.605	0.979982	0.000775485
0.0124614	240.821	0.798258	0.00077914
0.0134583	184.47	0.642442	0.000791741
0.0145349	140.554	0.516345	0.000802645
0.0156977	104.469	0.409717	0.00081224
0.0169536	75.2648	0.320957	0.000830829
0.0183098	53.3645	0.249739	0.000849839
0.0197746	36.7153	0.192374	0.000871093
0.0213566	23.865	0.144026	0.000898218
0.0230651	15.1283	0.106852	0.000930329
0.0249103	9.17284	0.0777614	0.00095619
0.0269032	5.34027	0.0560289	0.000998066
0.0290554	3.03543	0.0401708	0.00104564
0.0313799	1.72588	0.0291079	0.00109609
0.0338903	1.11707	0.022589	0.00115651
0.0366015	0.784266	0.0184988	0.00121636
0.0395296	0.668925	0.0166312	0.00128169
0.042692	0.552452	0.0148716	0.00134947
0.0461073	0.467328	0.0134503	0.00143647
0.0497959	0.387058	0.0121429	0.00151777
0.0537796	0.302351	0.0108148	0.00161483
0.0580819	0.238054	0.00992518	0.00171317
0.0627285	0.18064	0.00895187	0.00182194
0.0677468	0.14476	0.00846474	0.00192916
0.0731665	0.113154	0.00820578	0.00207551
0.0790198	0.120478	0.00823806	0.00219436
0.0853414	0.0788733	0.00813824	0.00235157
0.0921687	0.0789095	0.0081138	0.0025095
0.0995422	0.0874866	0.00877248	0.00268841
0.107506	0.0774005	0.00901235	0.00287844
0.116106	0.0651822	0.0101778	0.00309229
0.125395	0.0714263	0.0118101	0.00332123
0.135426	0.0371799	0.0133233	0.00356675
0.14626	0.0491609	0.0161158	0.00381231
0.157961	0.0719605	0.019277	0.00409378
0.170598	0.0381756	0.0257696	0.00439878
0.184246	0.0989205	0.0362398	0.00469611
0.198985	0.0816036	0.0520869	0.00503862
0.214904	0.0530092	0.0748017	0.00541451
0.232097	-0.0464808	0.0716991	0
0.250664	0	1000000	0

## Sheet: N1035_50_FIT
<X>	<Y>	N10E5 50 °C FlexCyl + PGC
0.00156	11413.2
0.0016848	10820.1
0.00181958	10148.9
0.00196515	9467.98
0.00212236	8763.16
0.00229215	8060.35
0.00247552	7344.53
0.00267357	6614.57
0.00288745	5932.89
0.00311845	5281.05
0.00336792	4667.3
0.00363736	4100.46
0.00392835	3582.5
0.00424261	3115.96
0.00458202	2681.85
0.00494858	2320.92
0.00534447	1995.24
0.00577203	1708.82
0.00623379	1457.45
0.00673249	1228.66
0.00727109	1039.05
0.00785278	873.262
0.008481	728.83
0.00915948	598.57
0.00989224	491.456
0.0106836	398.963
0.0115383	319.661
0.0124614	252.108
0.0134583	195.263
0.0145349	146.49
0.0156977	108.372
0.0169536	77.8202
0.0183098	53.9664
0.0197746	35.9454
0.0213566	22.8859
0.0230651	13.9021
0.0249103	8.10631
0.0269032	4.66479
0.0290554	2.80393
0.0313799	1.8854
0.0338903	1.43983
0.0366015	1.17756
0.0395296	0.957964
0.042692	0.745765
0.0461073	0.55664
0.0497959	0.410448
0.0537796	0.31027
0.0580819	0.237172
0.0627285	0.193776
0.0677468	0.161282
0.0731665	0.136959
0.0790198	0.11924
0.0853414	0.106172
0.0921687	0.0966042
0.0995422	0.0895383
0.107506	0.084353
0.116106	0.0807421
0.125395	0.0778946
0.135426	0.0758019
0.14626	0.0742691
0.157961	0.0731413
0.170598	0.0723079
0.184246	0.071694
0.198985	0.0712447
0.214904	0.0709159
0.232097	0.0706736
0.250664	0.0704945

## Sheet: N1035_50_PARAM txt
sasview_parameter_values	Column1	_1	_2	_3	_4	_5	_6	_7
model_name	FlexCylPlusPGC
scale	False	1		0.0	inf	()
background	False	0.07		-inf	inf	()
A_scale	False	0.0062093		-inf	inf	()
A_length	True	17420	166.58	0.0	inf	()
A_kuhn_length	True	94.778	0.12793	0.0	inf	()
A_radius	True	124.9	0.082985	0.0	inf	()
A_sld	False	0.9		-inf	inf	()
A_sld_solvent	False	6.37		-inf	inf	()
B_scale	False	0	0.00059936	-inf	inf	()
B_i_zero	False	20		0.0	inf	()
B_rg	False	54		0.0	inf	()
B_polydispersity	False	1.8		1.8	inf	()
A_length.width	False	0		0	1	35	3	gaussian
A_kuhn_length.width	False	0		0.0	1.0	35	3	gaussian
A_radius.width	False	0.2		0	1	35	3	gaussian

[truncated: 1 more sheets: Sheet1]
